# Supplementary material for: Damage to the structural connectome reflected in resting-state fMRI functional connectivity
Source: PubMed Central journal article supplement (PMC7781612; doi:10.1162/netn_a_00160), 2020-12-01
Supplement: netn-04-1197-s001.pdf [file netn-04-1197-s001.pdf]

## Supplementary Information - Damage to the Structural Connectome reflected in resting state fMRI Functional Connectivity

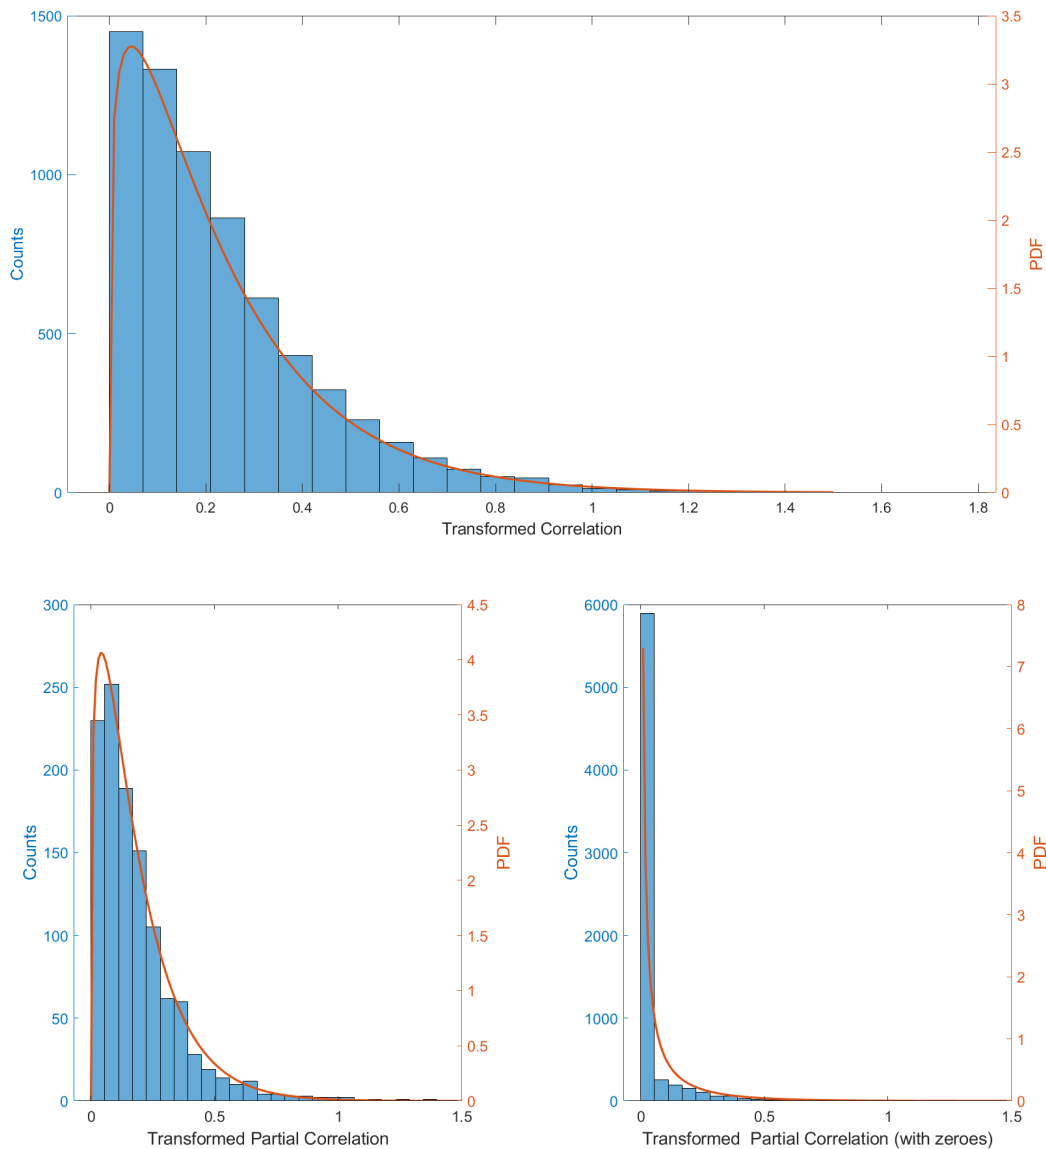

*Supp Figure 1 – Gamma Distribution Fits Correlation and Partial Correlation: We show how data are well matched by a gamma distribution fit to the correlation (fMRI-C) and the partial correlation (fMRI-PC) estimated across pairs of ROIs. In the lower row we show the difference between examining the partial correlation without and with zeroes. Optimally, given more subjects, we would fit a binomial-gamma hurdle model but we have far too few data points to fit more than one parameter. Thus, with the motivation of maximizing power we fit only a gamma GLM to the partial correlation data at each edge.*

Wodeyar, A., Cassidy, J. M., Cramer, S. C. & Srinivasan, R. (2020). Supporting information for “Damage to the Structural Connectome reflected in resting state fMRI Functional Connectivity.” *Network Neuroscience*. Advance publication. <https://doi.org/10.1162/netn.a.00160>

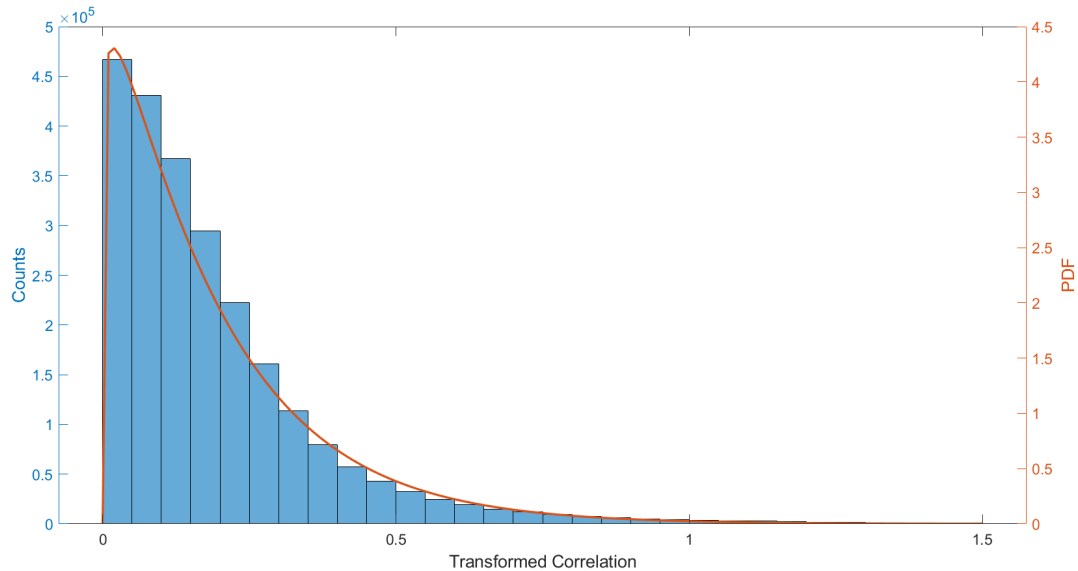

*Supp. Figure 2 - Gamma Distribution Fit to Voxel Correlation: We show that the voxel to voxel correlations are well fit by a gamma distribution.*

| Number of Subjects (threshold) | Correlation       |                  | Partial Correlation |                  | Streamline Correlation |           |
|--------------------------------|-------------------|------------------|---------------------|------------------|------------------------|-----------|
|                                | Edges Significant | Num Edges Tested | Edges Significant   | Num Edges Tested | Edges Significant      | Num Edges |
| 3                              | 1                 | 341              | 80                  | 341              | 132                    | 341       |
| 4                              | 1                 | 287              | 70                  | 287              | 111                    | 287       |
| 5                              | 1                 | 207              | 52                  | 207              | 79                     | 207       |
| 6                              | 0                 | 104              | 23                  | 104              | 38                     | 104       |
| 7                              | 0                 | 37               | 8                   | 37               | 15                     | 37        |
| 8                              | 0                 | 13               | 3                   | 13               | 6                      | 13        |
| 9                              | 0                 | 4                | 2                   | 4                | 2                      | 4         |
| 10                             | 0                 | 3                | 2                   | 3                | 1                      | 3         |

**Supp. Table 1 - Edges Significant as a Function of Number of Subjects:** We show the number of edges identified as significant (i.e. there was a significant difference in the functional connectivity between undamaged and damaged SC edges) at different thresholds on the number of subjects showing high damage. See Methods section for details.

Wodeyar, A., Cassidy, J. M., Cramer, S. C. & Srinivasan, R. (2020). Supporting information for “Damage to the Structural Connectome reflected in resting state fMRI Functional Connectivity.” *Network Neuroscience*. Advance publication. <https://doi.org/10.1162/netn.a.00160>

| Area One      | Area Two     | Edges Modulated | Edges Modeled | Ratio |
|---------------|--------------|-----------------|---------------|-------|
| 'U-Frontal'   | 'D-Frontal'  | 1               | 17            | 0.06  |
| 'D-Frontal'   | 'D-Frontal'  | 4               | 7             | 0.57  |
| 'U-Motor'     | 'D-Motor'    | 6               | 32            | 0.19  |
| 'D-Frontal'   | 'D-Motor'    | 2               | 15            | 0.13  |
| 'D-Motor'     | 'D-Motor'    | 3               | 13            | 0.23  |
| 'U-Parietal'  | 'D-Parietal' | 14              | 39            | 0.36  |
| 'D-Motor'     | 'D-Parietal' | 4               | 20            | 0.20  |
| 'D-Parietal'  | 'D-Parietal' | 2               | 2             | 1.00  |
| 'U-Temporal'  | 'D-Temporal' | 22              | 70            | 0.31  |
| 'D-Frontal'   | 'D-Temporal' | 4               | 24            | 0.17  |
| 'D-Motor'     | 'D-Temporal' | 4               | 10            | 0.40  |
| 'D-Parietal'  | 'D-Temporal' | 4               | 23            | 0.17  |
| 'D-Occipital' | 'D-Temporal' | 1               | 13            | 0.08  |
| 'D-Temporal'  | 'D-Temporal' | 1               | 4             | 0.25  |
| 'D-Frontal'   | 'D-Insula'   | 1               | 6             | 0.17  |
| 'D-Motor'     | 'D-Insula'   | 3               | 10            | 0.30  |
| 'D-Parietal'  | 'D-Insula'   | 4               | 7             | 0.57  |

**Supp. Table 2 - Number of Edges Significant For All Pairs of ROIs using fMRI-PC:** We show above, for any pair of ROIs that have at least one edge that showed modulation of the fMRI-PC, how many edges were tested and the ratio between edges that show up as significant and total edges tested. (Note that D- stands for Damaged-Side and U- stands for Undamaged-side)

Wodeyar, A., Cassidy, J. M., Cramer, S. C. & Srinivasan, R. (2020). Supporting information for “Damage to the Structural Connectome reflected in resting state fMRI Functional Connectivity.” *Network Neuroscience*. Advance publication. <https://doi.org/10.1162/netn.a.00160>

| Area One      | Area Two      | Edges Modulated | Edges Modeled | Ratio |
|---------------|---------------|-----------------|---------------|-------|
| 'U-Frontal'   | 'D-Frontal'   | 7               | 17            | 0.41  |
| 'D-Frontal'   | 'D-Frontal'   | 4               | 7             | 0.57  |
| 'U-Motor'     | 'D-Motor'     | 13              | 32            | 0.41  |
| 'D-Frontal'   | 'D-Motor'     | 6               | 15            | 0.40  |
| 'D-Motor'     | 'D-Motor'     | 8               | 13            | 0.62  |
| 'U-Parietal'  | 'D-Parietal'  | 14              | 39            | 0.36  |
| 'D-Frontal'   | 'D-Parietal'  | 1               | 4             | 0.25  |
| 'D-Motor'     | 'D-Parietal'  | 10              | 20            | 0.50  |
| 'D-Frontal'   | 'D-Occipital' | 8               | 12            | 0.67  |
| 'U-Temporal'  | 'D-Temporal'  | 21              | 70            | 0.30  |
| 'D-Frontal'   | 'D-Temporal'  | 8               | 24            | 0.33  |
| 'D-Motor'     | 'D-Temporal'  | 3               | 10            | 0.30  |
| 'D-Parietal'  | 'D-Temporal'  | 7               | 23            | 0.30  |
| 'D-Occipital' | 'D-Temporal'  | 8               | 13            | 0.62  |
| 'D-Temporal'  | 'D-Temporal'  | 3               | 4             | 0.75  |
| 'D-Motor'     | 'D-Insula'    | 5               | 10            | 0.50  |
| 'D-Parietal'  | 'D-Insula'    | 5               | 7             | 0.71  |
| 'D-Temporal'  | 'D-Insula'    | 1               | 4             | 0.25  |

**Supp. Table 3 - Number of Edges Significant For All Pairs of ROIs using fMRI-sFC:** We show above, for any pair of ROIs that have at least one edge that showed modulation of the fMRI-sFC, how many edges were tested and the ratio between edges that show up as significant and total edges tested. (Note that D- stands for Damaged-Side and U- stands for Undamaged-side)

Wodeyar, A., Cassidy, J. M., Cramer, S. C. & Srinivasan, R. (2020). Supporting information for "Damage to the Structural Connectome reflected in resting state fMRI Functional Connectivity." *Network Neuroscience*. Advance publication. [https://doi.org/10.1162/netn\\_a\\_00160](https://doi.org/10.1162/netn_a_00160)
